# Supplementary material for: Synthèse et étude de matériaux moléculaires à transition de spin
Source: Springer Nature journal article supplement (doi:10.1007/s10557-019-06860-6), 2012-05-21
Supplement: MOESM1 [file 16465806]

Supplemental Data

**Table 1. Arterial blood gas analyses and electrolytes at 1 hour after initiation of resuscitation**

|  | Control group | RIPC group | P value |
| --- | --- | --- | --- |
| pH | 7.40 ± 0.02 | 7.42 ± 0.01 | 0.545 |
| pCO2 (mmHg) | 26.2 ± 1.6 | 25.5 ± 1.4 | 0.752 |
| pO2 (mmHg) | 72 ± 3.9 | 81.3 ± 11.1 | 0.438 |
| Na (mmol/L) | 136.1 ± 0.7 | 134.8 ± 0.7 | 0.214 |
| K (mmol/L) | 5.2 ± 0.2 | 5.3 ± 0.2 | 0.586 |
| Cl (mmol/L) | 115.5 ± 0.9 | 114.7 ± 0.7 | 0.512 |
| iCa (mmol/L) | 1.16 ± 0.02 | 1.15 ± 0.01 | 0.609 |
| Glu (mg/dl) | 283.8 ± 17.1 | 272.9 ± 19.9 | 0.688 |
| Lac (mmol/L) | 1.9 ± 0.2 | 1.5 ± 0.1 | 0.072 |

pH = minus the log of the hydrogen ion (H+) concentration; PaCO2 = arterial partial pressure of carbon dioxide; PaO2 = arterial partial pressure of oxygen; Na = sodium; K = potassium; Cl = chloride; iCa = ionized calcium; Glu = glucose; Lac = lactate.

**Table 2. Blood hematology and biochemistry at 1 hour after initiation of shed blood reinfusion**

|  | control group | RIPC group | p value |
| --- | --- | --- | --- |
| Neutrophil (%) | 27.1 ± 1.7 | 27.2 ± 1.8 | 0.973 |
| Neutrophil (/uL) | 2321.2 ± 166.0 | 2263.2 ± 182.4 | 0.815 |
| Reticulocyte (%) | 2.6 ± 0.1 | 2.9 ± 0.2 | 0.127 |
| WBC (K/uL) | 8.6 ± 0.3 | 8.5 ± 0.4 | 0.790 |
| Absolute Reticulocyte (K/uL) | 183.6 ± 11.9 | 201.7 ± 11.1 | 0.313 |
| RBC (M/uL) | 7.1 ± 0.2 | 6.8 ± 0.3 | 0.438 |
| HGB (g/dL) | 13.6 ± 0.3 | 13.1 ± 0.5 | 0.417 |
| Lymphocyte (/uL) | 6132.9 ± 274.5 | 6064.2 ± 340.2 | 0.876 |
| Lymphocytes (%) | 71.2 ± 1.7 | 71.2 ± 1.8 | 0.997 |
| HCT (%) | 42.0 ± 1.1 | 39.6 ± 1.4 | 0.213 |
| Monocyte (/uL) | 59.7 ± 6.3 | 62.2 ± 7.1 | 0.797 |
| Monocytes (%) | 0.7 ± 0.1 | 0.8 ± 0.1 | 0.787 |
| Eosinophil (/uL) | 79.6 ± 6.7 | 69.3 ± 6.8 | 0.286 |
| Eosinophils (%) | 1.0 ± 0.1 | 0.8 ± 0.1 | 0.346 |
| MCV (fL) | 59.7 ± 0.6 | 59.3 ± 1.0 | 0.751 |
| Basophil (/uL) | 3.2 ± 1.1 | 2.6 ± 0.9 | 0.649 |
| Basophils (%) | 0.037 ± 0.013 | 0.027 ± 0.009 | 0.529 |
| MCH (pg) | 19.5 ± 0.5 | 19.9 ± 0.9 | 0.732 |
| MCHC (g/dL) | 32.7 ± 0.8 | 33.7 ± 1.5 | 0.593 |
| Platelet Count (K/uL) | 496.8 ± 12.0 | 511.4 ± 12.8 | 0.454 |
| Calcium (mg/dL) | 7.1 ± 0.2 | 6.8 ± 0.2 | 0.234 |
| Bicarbonate TCO2 (mmol/L) | 13.2 ± 0.5 | 13.4 ± 0.3 | 0.784 |
| Magnesium (mg/dL) | 2.0 ± 0.1 | 1.8 ± 0.1 | 0.043 |

WBC = white blood cell; RBC = red blood cell; HGB = hemoglobin; HCT = hematocrit; MCV = mean corpuscular volume; MCH = mean corpuscular hemoglobin; MCHC = mean corpuscular hemoglobin concentration.

**Table 3: Serum biochemistry at 48 hours**

| Measurements (normal range) | Control group | RIPC group | P value |
| --- | --- | --- | --- |
| AST (45.7-80.8 U/L) | 147.6 ± 20.8 | 296.1 ± 93.1 | 0.148 |
| ALT (17.5-30.2 U/L) | 41.4 ± 4.5 | 103.5 ± 51.8 | 0.260 |
| Lipase (U/L) (0-160 U/L) | 16.6 ± 2.5 | 17.9 ± 2.0 | 0.688 |
| Total Bilirubin (0.2-0.55 mg/dL) | 0.1 ± 0.02 | 0.1 ± 0.0 | 0.374 |
| BUN (15-21 mg/dL) | 22.0 ± 1.7 | 17.3 ± 1.2 | 0.050 |
| Creatinine (0.2-0.8 mg/dL) | 0.2 ± 0.1 | 0.3 ± 0.1 | 0.109 |
| Troponin I (0.002-0.015 ng/ml) | 0.036 ± 0.036 | 0.001 ± 0.001 | 0.387 |
| CK-MB [ng/ml] (< 5 ng/ml) | 2.7 ± 1.7 | 2.8 ± 1.4 | 0.990 |

AST = aspartate aminotransferase; ALT = alanine aminotransferase; BUN = blood urea nitrogen; CK – MB = creatine kinase-muscle/brain.
